# Supplementary material
Source: Springer Nature journal article supplement (https://www.springermedizin.de/resource/supplementary/13601_2011_5_MOESM2_ESM.pdf/9677268)
Supplement: MOESM2 [file 9677268]

|                                      | <b>SUBGROUPS</b>                                                                                                                                                                                                                                                   |
|--------------------------------------|--------------------------------------------------------------------------------------------------------------------------------------------------------------------------------------------------------------------------------------------------------------------|
| <b>RHINITIS</b>                      |                                                                                                                                                                                                                                                                    |
| Allergic rhinitis                    | Intermittent / persistent<br>Mild / moderate / severe<br>Occupational                                                                                                                                                                                              |
| Infectious rhinitis                  | Viral<br>Bacterial<br>Non-viral non-bacterial (Protozoa / fungi)                                                                                                                                                                                                   |
| Non-allergic non-infectious rhinitis | Drug-induced ( $\beta$ blockers / vasodilators / contraceptives / aspirin / NSAID)<br>Hormonal (hypothyroidism / pregnancy)<br>NARES (some have local IgE production)<br>Occupational (LMW agents / irritants)<br>Atrophic / rhinitis of the elderly<br>Idiopathic |
| <b>RHINOSINUSITIS</b>                | Acute / chronic<br>Mild / moderate / severe                                                                                                                                                                                                                        |
